# Supplementary material
Source: publisher figshare collection journal article supplement (https://gsajournals.figshare.com/articles/dataset/_/13143596)
Supplement: Supplementary file 1 [file 1]

**A**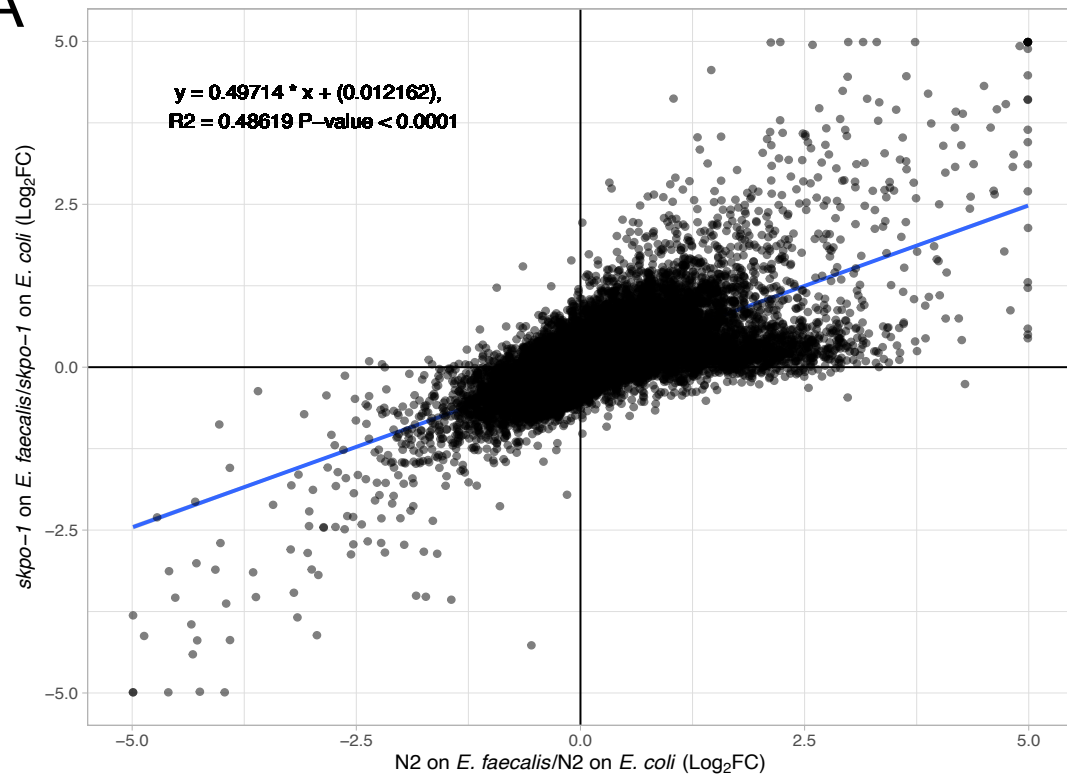**B**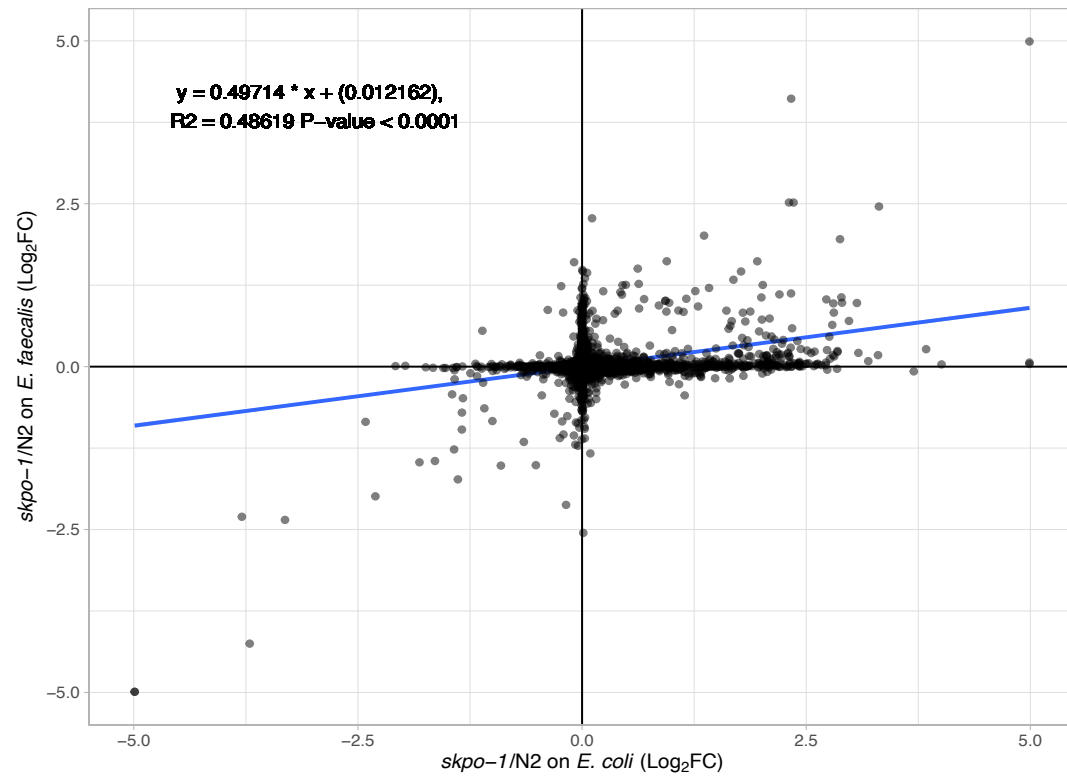

**Figure S2. Comparison of gene expression changes** (A) The  $|\log_2FC|$  values of all the genes based on *E. faecalis* exposure relative to *E. coli* exposure were plotted for the *skpo-1* mutant vs. N2 animals. (B) The  $|\log_2FC|$  values of all the genes in the *skpo-1* mutant background relative to N2 were plotted for animals exposed to *E. faecalis* vs. *E. coli*. The original data are in Table S1.
