# Supplementary material
Source: publisher figshare collection journal article supplement (https://gsajournals.figshare.com/articles/dataset/_/13143596)
Supplement: Supplementary file 2 [file 1]

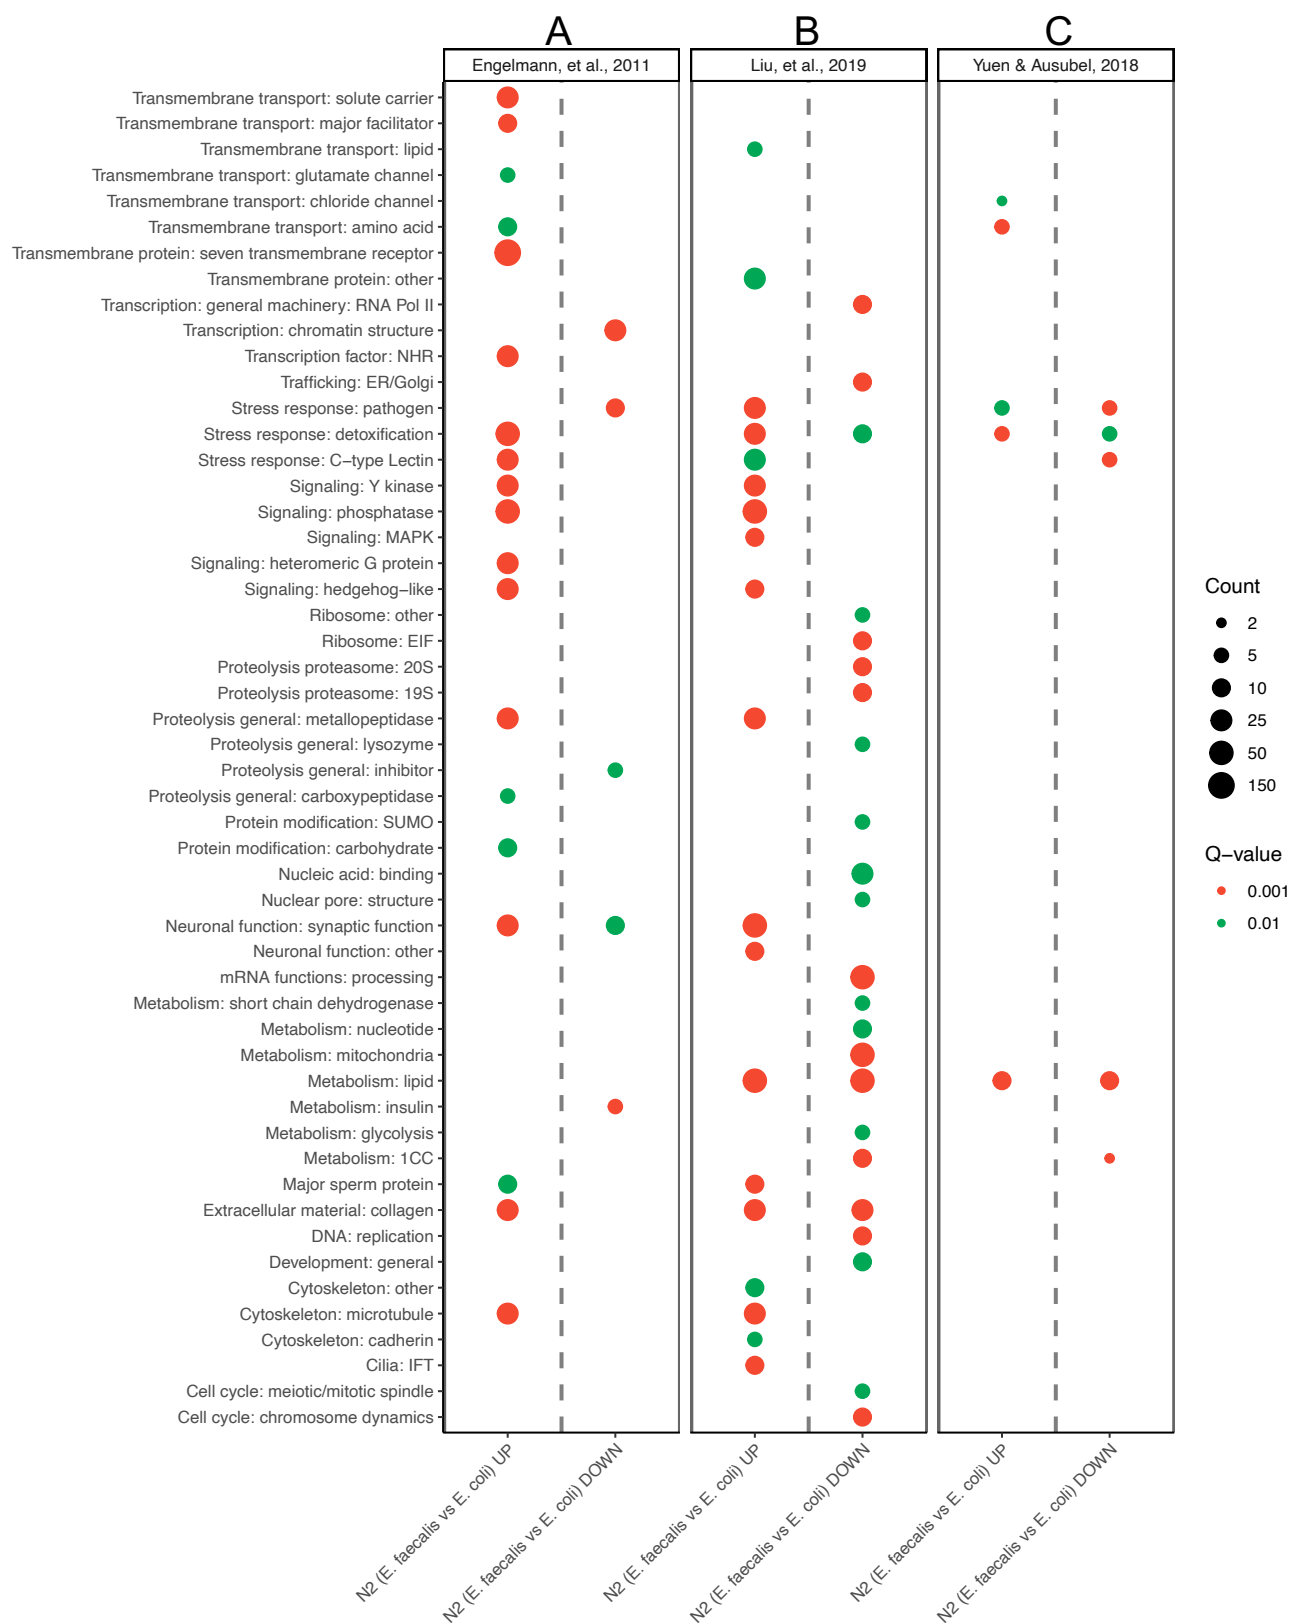

**Figure S3. WormCat analysis of genes with significant changes in regulation upon exposure to *E. faecalis* from previous studies.** (A) L4 animals were exposed to *E. faecalis* OG1RF and gene expression compared to those on *E. coli* OP50 (Engelmann *et al.* 2011). (B) L4 animals were exposed to *E. faecalis* OG1RF and gene expression compared to those on *E. coli* OP50 (Liu *et al.* 2019). (C) Adult animals were exposed to *E. faecalis* MMH594 and compared to heat killed *E. coli* OP50 (Yuen and Ausubel 2018). Category 2 enrichment annotations are shown for genes that had a  $|\log_2FC| \geq 1$  and a  $Q < 0.05$ . The size of the dot represents the number of genes associated with a category. The color represents the strength of the enrichment significance with green indicating a  $Q < 0.01$  and red indicating a  $Q < 0.001$ .
