# Supplementary material
Source: publisher figshare collection journal article supplement (https://gsajournals.figshare.com/articles/dataset/_/13143596)
Supplement: Supplementary file 3 [file 1]

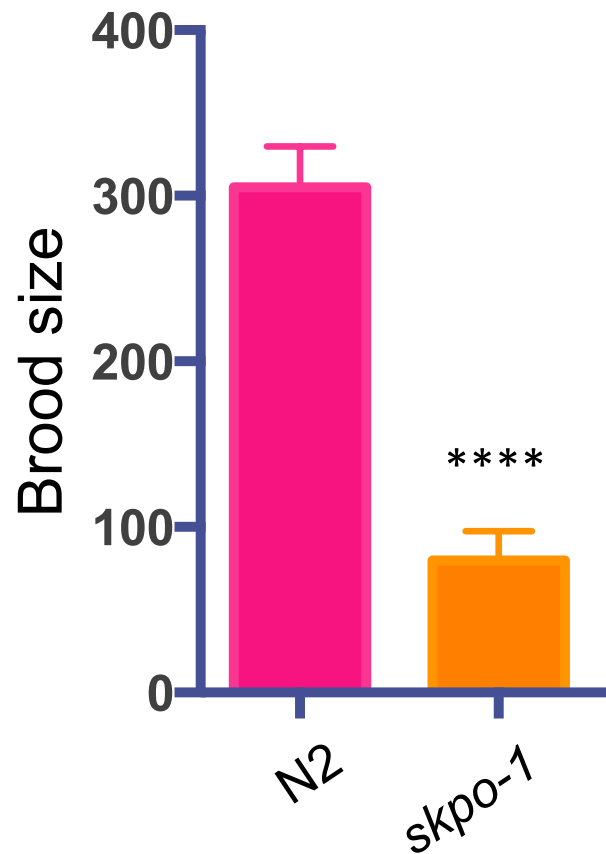

**Figure S5. Brood size.** *skpo-1* mutants had significantly smaller brood sizes compared to N2 worms. \*\*\*\*P < 0.0001, N = 9. Error bars represent the SEM, and P-values were calculated via Student's paired t-test. Data are representative of three independent replicates.
