# Supplementary material
Source: publisher figshare collection journal article supplement (https://gsajournals.figshare.com/articles/dataset/_/13143596)
Supplement: Supplementary file 4 [file 1]

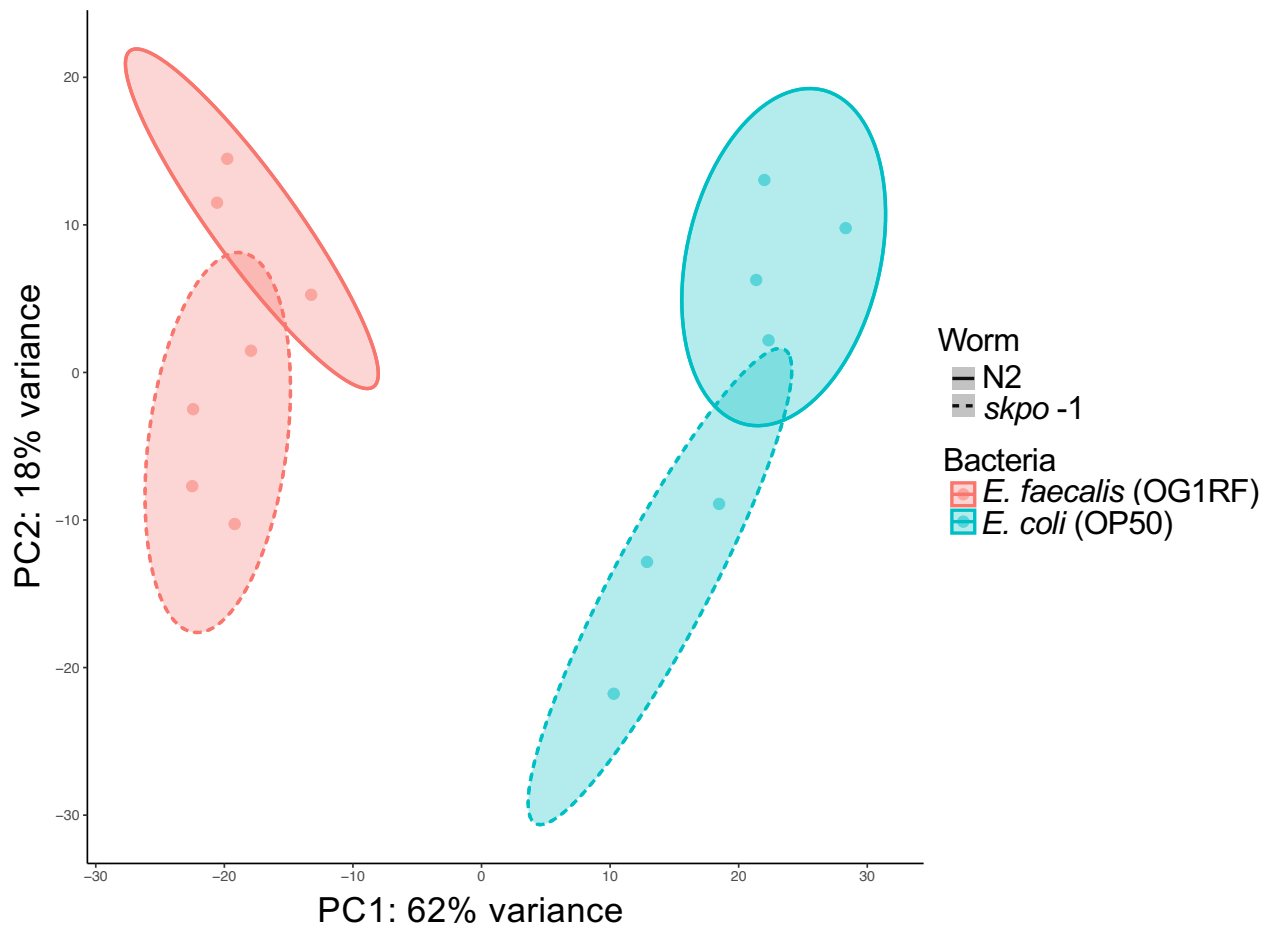

**Figure S1. Principal component analysis.** Principal component analysis demonstrated a general clustering of the biological replicates that had the same genotype and were exposed to the same bacterium, indicating consistency. When considering just the bacterial exposure, *E. faecalis* vs. *E. coli*, a large separation between the two conditions was evident (PC1). When considering just genotype, the *skpo*-1 mutant vs. N2, a more modest separation was observed (PC2).
