# Supplementary material
Source: publisher figshare collection journal article supplement (https://gsajournals.figshare.com/articles/dataset/_/13143596)
Supplement: Supplementary file 5 [file 1]

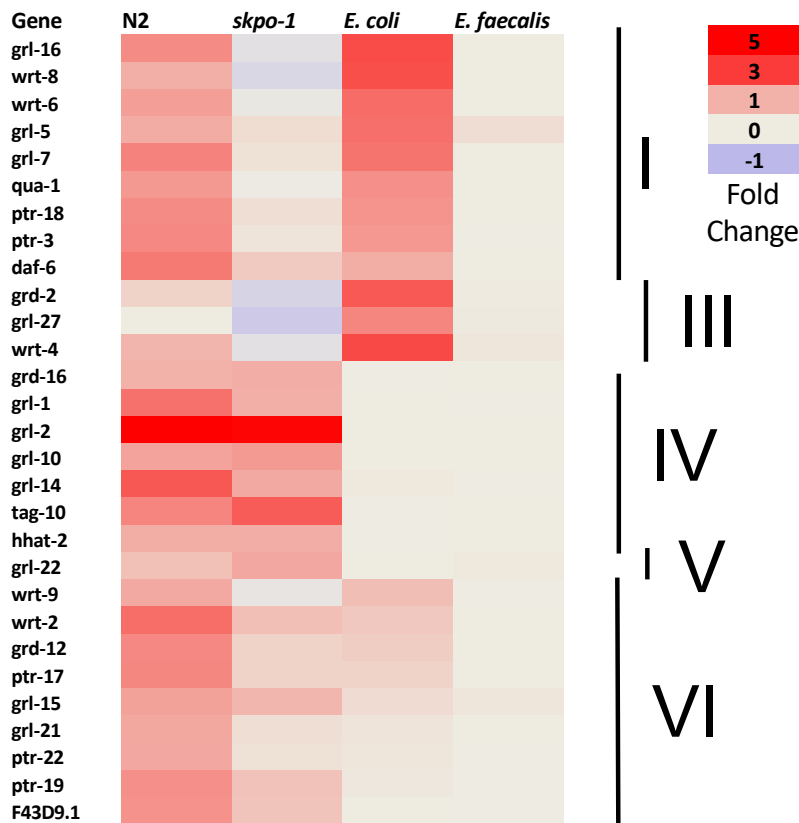

**Figure S4. Heat map of genes encoding hedgehog-like proteins that changed significantly in at least one condition.** The values of the genes in the hedgehog-like category that changed significantly ( $|\log_2FC| \geq 1$ ,  $Q < 0.05$ ). The first two columns are the changes based on *E. faecalis* exposure relative to *E. coli* for N2 and *skpo-1* mutant animals. The third and fourth column are the changes in the *skpo-1* mutant animals relative to the N2 animals on *E. coli* and *E. faecalis*, respectively. Lines labelled with Roman numerals encompass the same groups of genes as originally described in the Figure 3 legend. I) Genes upregulated in N2 animals on *E. faecalis* relative to *E. coli* and in *skpo-1* mutant animals relative to N2 on *E. coli*. III) Genes only upregulated in *skpo-1* mutant animals relative to N2 on *E. coli*. IV) Genes upregulated in N2 and *skpo-1* mutant animals on *E. faecalis* relative to *E. coli*. V) Genes upregulated only in *skpo-1* mutant animals on *E. faecalis* relative to *E. coli*. VI) Genes upregulated only in N2 animals on *E. faecalis* relative to *E. coli*.
